# Supplementary material for: Survival Following Implantable Cardioverter‐Defibrillator Implantation in Patients With Amyloid Cardiomyopathy
Source: PubMed Central journal article supplement — J Am Heart Assoc. 2020 Sep 1;9(18):e016038. doi: 10.1161/JAHA.120.016038 (PMC7726970; doi:10.1161/jaha.120.016038), 2020-09-01
Supplement: JAH3-9-e016038-s001.pdf [file JAH3-9-e016038-s001.pdf]

# **Supplemental Material**

**Table S1. Baseline characteristics stratified by type of cardiomyopathy for entire non-propensity matched cohort.**

| Description                    | Total<br>n (%) | Amyloidosis<br>n (%) | NICM<br>n (%) | p-value |
|--------------------------------|----------------|----------------------|---------------|---------|
| All                            | 451026         | 593                  | 450433        |         |
| <b>Demographics</b>            |                |                      |               |         |
| Age, mean (SD), years          | 65 (13.4)      | 68 (11.6)            | 65 (13.4)     | <0.001  |
| Sex female                     | 129665 (28.7)  | 127 (21.4)           | 129538 (28.8) | <0.001  |
| Race                           |                |                      |               | <0.001  |
| White (non-Hispanic)           | 338217 (75.0)  | 377 (63.6)           | 337840 (75.0) |         |
| Black (non-Hispanic)           | 72839 (16.1)   | 186 (31.4)           | 72653 (16.1)  |         |
| Hispanic                       | 28375 (6.3)    | 19 (3.2)             | 28356 (6.3)   |         |
| Other                          | 11595 (2.6)    | 11 (1.9)             | 11584 (2.6)   |         |
| <b>Clinical history</b>        |                |                      |               |         |
| Heart failure                  | 364299 (80.8)  | 500 (84.3)           | 363799 (80.8) | 0.08    |
| NYHA class                     |                |                      |               | 0.001   |
| Class I                        | 64320 (14.3)   | 78 (13.2)            | 64242 (14.3)  |         |
| Class II                       | 164261 (36.4)  | 204 (34.4)           | 164057 (36.4) |         |
| Class III                      | 207963 (46.1)  | 278 (46.9)           | 207685 (46.1) |         |
| Class IV                       | 12623 (2.8)    | 33 (5.6)             | 12590 (2.8)   |         |
| Syncope                        | 75418 (16.7)   | 155 (26.1)           | 75263 (16.7)  | <0.001  |
| Family history of sudden death | 16617 (3.7)    | 25 (4.2)             | 16592 (3.7)   | 0.71    |
| Atrial fibrillation/flutter    | 132002 (29.3)  | 281 (47.4)           | 131721 (29.2) | <0.001  |

|                                             |               |            |               |        |
|---------------------------------------------|---------------|------------|---------------|--------|
| Ventricular tachycardia (VT)                | 135002 (29.9) | 298 (50.3) | 134704 (29.9) | <0.001 |
| Ventricular tachycardia type                |               |            |               | <0.001 |
| Non-sustained VT                            | 69603 (51.6)  | 199 (66.8) | 69404 (51.5)  |        |
| Sustained monomorphic VT                    | 36777 (27.2)  | 61 (20.5)  | 36716 (27.3)  |        |
| Sustained polymorphic VT                    | 9007 (6.7)    | 11 (3.7)   | 8996 (6.7)    |        |
| Sustained monomorphic and<br>polymorphic VT | 6024(4.5)     | 9 (3.0)    | 6015 (4.5)    |        |
| Unknown                                     | 13418 (9.9)   | 18 (6.0)   | 13400 (9.9)   |        |
| Cerebrovascular disease                     | 65347 (14.5)  | 58 (9.8)   | 65289 (14.5)  | <0.001 |
| Lung disease                                | 95653 (21.2)  | 77 (13.0)  | 95576 (21.2)  | <0.001 |
| Diabetes mellitus                           | 174893 (38.8) | 116 (19.6) | 174777 (38.8) | <0.001 |
| Sleep Apnea                                 | 60186 (13.3)  | 80 (13.5)  | 60106 (13.3)  | 0.04   |
| Current dialysis                            | 14339 (3.2)   | 24 (4.0)   | 14315 (3.2)   | 0.11   |
| Hypertension                                | 360190 (79.9) | 360 (60.7) | 359830 (79.9) | <0.001 |
| Patient life expectancy of $\geq 1$<br>year |               |            |               | <0.001 |
| No                                          | 10850 (2.4)   | 15 (2.5)   | 10835 (2.4)   |        |
| Yes                                         | 165575 (36.7) | 249 (42.0) | 165326 (36.7) |        |
| Not documented                              | 272660 (60.5) | 320 (54.0) | 272340 (60.5) |        |
| <b>Diagnostic studies</b>                   |               |            |               |        |
| LVEF                                        |               |            |               | <0.001 |
| $\leq 30$                                   | 322976 (71.6) | 246 (41.5) | 322730 (71.6) |        |
| $>30$ to 40                                 | 72044 (16.0)  | 122 (20.6) | 71922 (16.0)  |        |

|                                              |               |             |               |         |
|----------------------------------------------|---------------|-------------|---------------|---------|
| >40                                          | 49668 (11.0)  | 205 (34.6)  | 49463 (11.0)  |         |
| QRS duration (non-VT paced complex)          |               |             |               | 0.23    |
| ≤140                                         | 324745 (72.0) | 445 (75.0)  | 324300 (72.0) |         |
| >140                                         | 119686 (26.5) | 139 (23.4)  | 119547 (26.5) |         |
| Creatinine, mean (SD)                        | 1 (1.2)       | 2 (1.4)     | 1 (1.2)       | <0.001  |
| Inducible ventricular arrhythmia on EP study | 310 (11.0)    | 28 (5.9)    | 282 (12.0)    | 0.0003  |
| Abnormal intraventricular conduction         | 1357 (47.9)   | 244 (51.7)  | 1113 (47.2)   | 0.19    |
| Cardiac rhythm paced                         | 44 (1.6)      | 7 (1.5)     | 37 (1.6)      | 0.89    |
| Cardiac rhythm third degree heart block      | 53 (1.9)      | 20 (4.2)    | 33 (1.4)      | <0.0001 |
| Brain natriuretic peptide, mean (SD)         | 1111 (1468)   | 1244 (1617) | 1072 (1421)   | 0.24    |
| <b>Medications</b>                           |               |             |               |         |
| ACE inhibitor                                | 269415 (59.7) | 172 (29.0)  | 269243 (59.8) | <0.001  |
| Angiotensin receptor blocker                 | 79842 (17.7)  | 82 (13.8)   | 79760 (17.7)  | 0.01    |
| Aspirin                                      | 320489 (71.1) | 294 (49.6)  | 320195 (71.1) | <0.001  |
| Beta blocker                                 | 404455 (89.7) | 369 (62.2)  | 404086 (89.7) | <0.001  |
| Statin                                       | 300452 (66.6) | 258 (43.5)  | 300194 (66.6) | <0.001  |
| Non-statin lipid medication                  | 38127 (8.5)   | 22 (3.7)    | 38105 (8.5)   | <0.001  |
| Clopidogrel                                  | 103730 (23.0) | 42 (7.1)    | 103688 (23.0) | <0.001  |

|                               |               |            |               |        |
|-------------------------------|---------------|------------|---------------|--------|
| Ticlopidine                   | 608 (0.1)     | 3 (0.5)    | 605 (0.1)     | 0.01   |
| Prasugrel                     | 9624 (2.1)    | 1 (0.2)    | 9623 (2.1)    | 0.001  |
| Antiarrhythmic agents         | 65577 (14.5)  | 116 (19.6) | 65461 (14.5)  | 0.002  |
| Diltiazem                     | 7422 (1.6)    | 7 (1.2)    | 7415 (1.6)    | 0.37   |
| Verapamil                     | 1895 (0.4)    | 2 (0.3)    | 1893 (0.4)    | 0.76   |
| Other calcium channel blocker | 31129 (6.9)   | 25 (4.2)   | 31104 (6.9)   | 0.01   |
| Digoxin                       | 63164 (14.0)  | 30 (5.1)   | 63134 (14.0)  | <0.001 |
| Diuretic                      | 278244 (61.7) | 439 (74.0) | 277805 (61.7) | <0.001 |
| Hydralazine                   | 24570 (5.4)   | 27 (4.6)   | 24543 (5.4)   | 0.34   |
| Long acting nitroglycerin     | 51466 (11.4)  | 28 (4.7)   | 51438 (11.4)  | <0.001 |
| Warfarin                      | 103859 (23.0) | 215 (36.3) | 103644 (23.0) | <0.001 |
| <b>Procedural factors</b>     |               |            |               |        |
| ICD indication                |               |            |               | 0.01   |
| Primary prevention            | 356999 (79.2) | 445 (75.0) | 356554 (79.2) |        |
| Secondary prevention          | 94027 (20.8)  | 148 (25.0) | 93879 (20.8)  |        |
| Device type                   |               |            |               | <0.001 |
| Single chamber                | 139427 (30.9) | 156 (26.3) | 139271 (30.9) |        |
| Dual chamber                  | 166460 (36.9) | 300 (50.6) | 166160 (36.9) |        |
| CRT-D                         | 144185 (32.0) | 135 (22.8) | 144050 (32.0) |        |

NICM, non-ischemic cardiomyopathy; SD, standard deviation; NYHA, New York Heart Association; VT, ventricular tachycardia; ACE, angiotensin converting enzyme; EP, electrophysiology; ICD, implantable cardioverter defibrillator; CRT-D, cardiac resynchronization therapy defibrillator

**Table S2. Univariate model for one-year survival among patients with cardiac amyloidosis.**

| <b>Description</b>          | <b>Hazard ratio</b> | <b>95% CI</b> | <b>p-value</b> |
|-----------------------------|---------------------|---------------|----------------|
| All                         |                     |               |                |
| <b>Demographics</b>         |                     |               |                |
| Age                         | 1.00                | 0.99-1.02     | 0.74           |
| Sex female                  | 0.90                | 0.59-1.38     | 0.64           |
| Race                        |                     |               |                |
| Black (non-Hispanic)        | 1.15                | 0.80-1.67     | 0.45           |
| Hispanic                    | 0.92                | 0.34-2.51     | 0.87           |
| Other                       | 0.37                | 0.05-2.63     | 0.32           |
| <b>Clinical history</b>     |                     |               |                |
| Heart failure               | 1.33                | 0.80-2.22     | 0.27           |
| Duration of heart failure   | 1.68                | 1.03-2.76     | 0.04           |
| <3 months                   |                     |               |                |
| NYHA class                  |                     |               |                |
| Class I                     | 0.88                | 0.48-1.59     | 0.67           |
| Class III                   | 1.28                | 0.86-1.90     | 0.93           |
| Class IV                    | 0.96                | 0.41-2.27     | 0.67           |
| Syncope                     | 1.84                | 1.28-2.65     | 0.001          |
| Family history of sudden    |                     | 0.10-1.66     | 0.21           |
| death                       | 0.41                |               |                |
| Atrial fibrillation/flutter | 1.15                | 0.81-1.62     | 0.44           |
| Ventricular tachycardia     | 1.66                | 1.17-2.36     | 0.005          |

|                                                 |      |           |         |
|-------------------------------------------------|------|-----------|---------|
| Cerebrovascular disease                         | 1.98 | 1.25-3.14 | 0.004   |
| Lung disease                                    | 1.39 | 0.88-2.18 | 0.16    |
| Diabetes mellitus                               | 1.41 | 0.96-2.07 | 0.08    |
| Sleep apnea                                     | 0.87 | 0.48-1.57 | 0.65    |
| Dialysis                                        | 3.37 | 1.86-6.12 | 0.0001  |
| Hypertension                                    | 1.16 | 0.79-1.71 | 0.45    |
| Patient life expectancy of<br>≥1 year           | 0.76 | 0.53-1.09 | 0.13    |
| <b>Diagnostic Studies</b>                       |      |           |         |
| Left ventricular ejection<br>fraction           |      |           |         |
| >30 to 40                                       | 0.85 | 0.53-1.36 | 0.50    |
| >40                                             | 0.91 | 0.59-1.40 | 0.67    |
| QRS duration >140                               | 0.73 | 0.47-1.14 | 0.16    |
| Creatinine 1.5-2.5 mg/dL                        | 2.01 | 1.33-3.03 | 0.0009  |
| Creatinine >2.5 mg/dL                           | 3.60 | 2.27-5.70 | <0.0001 |
| Inducible ventricular<br>arrhythmia on EP study | 0.48 | 0.18-1.31 | 0.15    |
| Abnormal intraventricular<br>conduction         | 0.88 | 0.62-1.24 | 0.47    |
| Paced rhythm                                    | 1.74 | 0.55-5.46 | 0.34    |
| Second degree heart block                       | 0.61 | 0.09-4.38 | 0.63    |
| Third degree heart block                        | 0.93 | 0.38-2.26 | 0.86    |

|                           |      |           |        |
|---------------------------|------|-----------|--------|
| Brain natriuretic peptide | 1.00 | 1.00-1.00 | 0.12   |
| <b>Procedural factors</b> |      |           |        |
| ICD indication            |      |           |        |
| Secondary prevention      | 1.96 | 1.36-2.81 | 0.0003 |
| Device type               |      |           |        |
| Single chamber            | 0.72 | 0.46-1.12 | 0.14   |
| CRT-D                     | 0.82 | 0.54-1.25 | 0.37   |

NYHA, New York Heart Association; ACE; angiotensin converting enzyme; EP, electrophysiology; ICD, implantable cardioverter defibrillator; CRT-D, cardiac resynchronization therapy defibrillator



**Table S3. Definitions of Variables Significant in Multivariable Analysis.**

|                         |                                                                                                                                                                                                                                                                                                                                                                     |
|-------------------------|---------------------------------------------------------------------------------------------------------------------------------------------------------------------------------------------------------------------------------------------------------------------------------------------------------------------------------------------------------------------|
| Syncope                 | Sudden loss of consciousness with loss of postural tone, not related to anesthesia, with spontaneous recovery as reported by patient or observer                                                                                                                                                                                                                    |
| Ventricular tachycardia | Three or more consecutive complexes in duration emanating from the ventricles at a rate of >100 beats per minute                                                                                                                                                                                                                                                    |
| Cerebrovascular disease | History of stroke (loss of neurological function with abrupt onset and symptoms >24 hours)<br><br>OR<br><br>Transient ischemic attack (loss of neurological function with abrupt onset and symptoms <24 hours)<br><br>OR<br><br>Non-invasive/invasive carotid test with > 79% occlusion or previous carotid artery surgery/intervention for carotid artery stenosis |
| Diabetes mellitus       | Physician diagnosis                                                                                                                                                                                                                                                                                                                                                 |

|  |    |
|--|----|
|  | OR |
|--|----|

|  |                                            |
|--|--------------------------------------------|
|  | Fasting blood sugar greater than 126 mg/dL |
|--|--------------------------------------------|
